# Supplementary material for: One-step in situ growth of ZnS nanoparticles on reduced graphene oxides and their improved lithium storage performance using sodium carboxymethyl cellulose binder
Source: Royal Society of Chemistry journal article supplement (doi:10.1039/c8ra00470f), 2018-01-01
Supplement: c8ra00470f1.pdf [file c8ra00470f1.pdf]

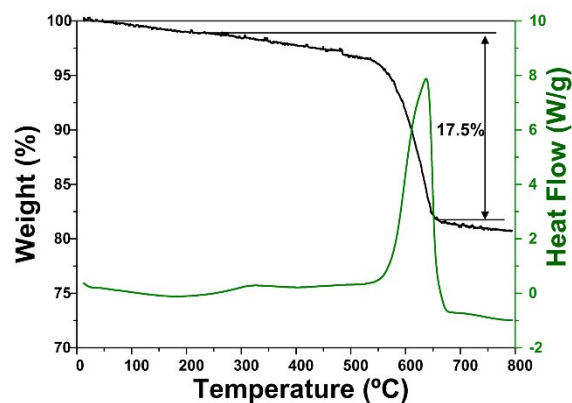

Fig. S1 TGA and DSC curves of ZS.

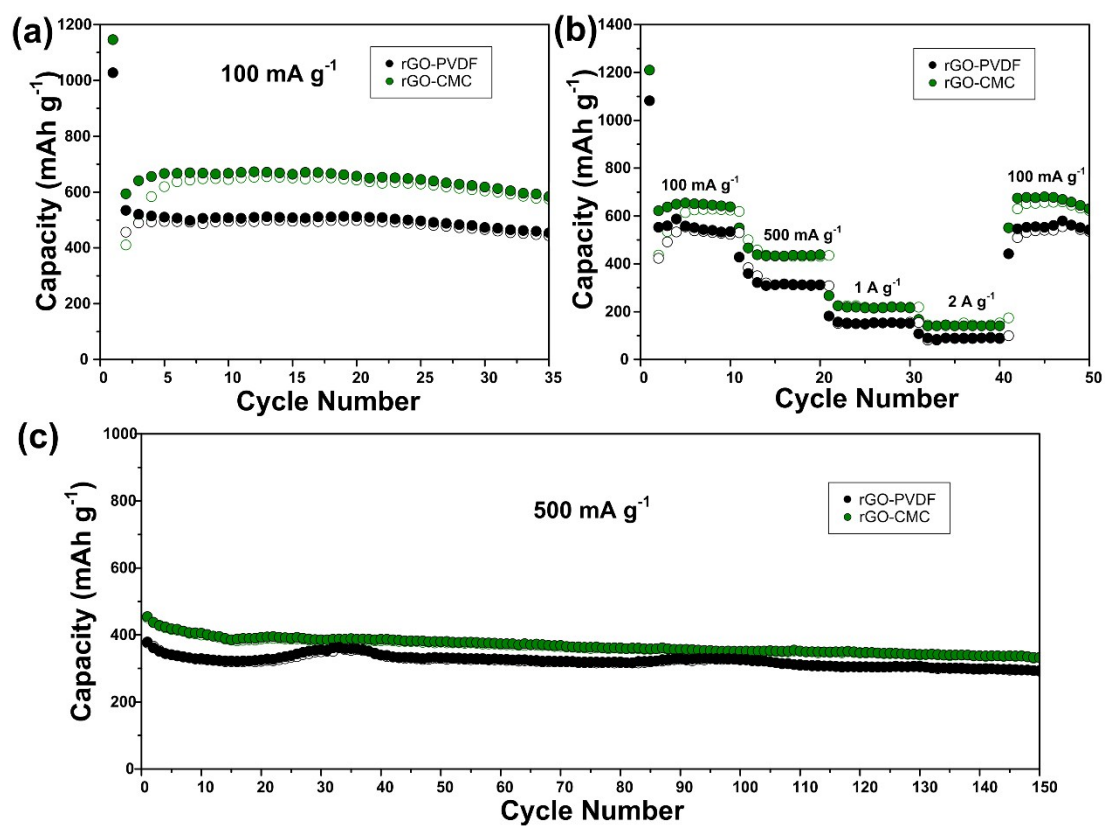

Fig. S2 (a) Cycling performance and (b) rate capability of rGO-PVDF and rGO-CMC. (c) Continuous long-term cycling performance of rGO-PVDF and rGO-CMC after the rate test.
